# Supplementary material
Source: PubMed Central journal article supplement (PMC10404067)
Supplement: web_material_kwac219.pdf [file web_material_kwac219.pdf]

## **WEB MATERIAL**

### **Endogenous Steroid Hormone Concentrations and Risk of Endometriosis in Nurses' Health Study II**

Amy L. Shafir, Fan Mu, A. Heather Eliassen, Madhavi Thombre Kulkarni, Kathryn L. Terry, Susan E. Hankinson, and Stacey A. Missmer

#### **Contents**

Web Tables 1–5

**Web Table 1.** Relative risks (and 95% confidence intervals) of laparoscopically confirmed endometriosis by quartile of plasma sex steroid hormone levels utilizing unconditional logistic regression

|                            | Quartile 1 | Quartile 2       | Quartile 3       | Quartile 4       | <i>P</i> for Trend <sup>1</sup> |
|----------------------------|------------|------------------|------------------|------------------|---------------------------------|
| <b>Estradiol</b>           |            |                  |                  |                  |                                 |
| Follicular                 |            |                  |                  |                  |                                 |
| Cutpoints (pg/mL)          | <27        | ≥27 – <40        | ≥40 – <59        | ≥59              |                                 |
| Cases/controls             | 54/164     | 117/166          | 93/168           | 83/165           |                                 |
| Multivariable <sup>2</sup> | 1.00       | 2.76 (1.78,4.28) | 2.19 (1.38,3.46) | 1.95 (1.23,3.11) | 0.16                            |
| Luteal                     |            |                  |                  |                  |                                 |
| Cutpoints (pg/mL)          | <98        | ≥98 – <133       | ≥133 – <187      | ≥187             |                                 |
| Cases/controls             | 89/186     | 104/180          | 106/190          | 78/185           |                                 |
| Multivariable              | 1.00       | 1.29 (0.88,1.91) | 1.35 (0.92,1.99) | 0.84 (0.56,1.27) | 0.26                            |
| <b>Free Estradiol</b>      |            |                  |                  |                  |                                 |
| Follicular                 |            |                  |                  |                  |                                 |
| Cutpoints (pg/mL)          | <0.34      | ≥0.34 – <0.49    | ≥0.49 – <0.71    | ≥0.71            |                                 |
| Cases/controls             | 64/164     | 98/164           | 112/164          | 70/164           |                                 |
| Multivariable              | 1.00       | 1.69 (1.10,2.58) | 2.23 (1.45,3.43) | 1.19 (0.76,1.88) | 0.86                            |
| Luteal                     |            |                  |                  |                  |                                 |
| Cutpoints (pg/mL)          | <1.23      | ≥1.23 – <1.63    | ≥1.63 – <2.21    | ≥2.21            |                                 |
| Cases/controls             | 94/185     | 111/185          | 84/185           | 88/185           |                                 |
| Multivariable              | 1.00       | 1.29 (0.88,1.88) | 0.87 (0.58,1.30) | 0.97 (0.65,1.45) | 0.50                            |
| <b>Estrone</b>             |            |                  |                  |                  |                                 |
| Follicular                 |            |                  |                  |                  |                                 |
| Cutpoints (pg/mL)          | <30        | ≥30 – <38        | ≥38 – <49        | ≥49              |                                 |
| Cases/controls             | 74/170     | 82/161           | 87/171           | 104/165          |                                 |
| Multivariable              | 1.00       | 1.17 (0.77,1.78) | 1.12 (0.73,1.72) | 1.49 (0.99,2.26) | 0.06                            |
| Luteal                     |            |                  |                  |                  |                                 |
| Cutpoints (pg/mL)          | <65        | ≥65 – <85        | ≥85 – <117       | ≥117             |                                 |
| Cases/controls             | 86/184     | 89/185           | 124/188          | 79/184           |                                 |
| Multivariate               | 1.00       | 1.08 (0.73,1.60) | 1.50 (1.02,2.18) | 0.86 (0.57,1.30) | 0.58                            |
| <b>Testosterone</b>        |            |                  |                  |                  |                                 |
| Cutpoints (ng/dL)          | <19        | ≥19 – <25        | ≥25 – <32        | ≥32              |                                 |
| Cases/controls             | 109/212    | 144/225          | 91/214           | 97/216           |                                 |
| Multivariable              | 1.00       | 1.33 (0.95,1.87) | 0.93 (0.65,1.35) | 0.94 (0.64,1.38) | 0.31                            |
| <b>Free testosterone</b>   |            |                  |                  |                  |                                 |
| Cutpoints (ng/dL)          | <0.13      | ≥0.13 – <0.19    | ≥0.19 – <0.27    | ≥0.27            |                                 |
| Cases/controls             | 106/208    | 106/208          | 108/209          | 105/208          |                                 |
| Multivariable              | 1.00       | 1.07 (0.74,1.53) | 1.08 (0.74,1.58) | 1.03 (0.68,1.55) | 0.94                            |
| <b>Progesterone</b>        |            |                  |                  |                  |                                 |
| Luteal                     |            |                  |                  |                  |                                 |
| Cutpoints (ng/mL)          | <7         | ≥7 – <14         | ≥14 – <20        | ≥20              |                                 |
| Cases/controls             | 106/188    | 92/188           | 106/188          | 78/188           |                                 |
| Multivariable              | 1.00       | 0.88 (0.59,1.29) | 1.16 (0.78,1.71) | 0.90 (0.58,1.40) | 0.94                            |
| <b>SHBG</b>                |            |                  |                  |                  |                                 |
| Cutpoints (nmol/L)         | <47        | ≥47 – <68        | ≥68 – <94        | ≥94              |                                 |
| Cases/controls             | 110/209    | 103/209          | 113/211          | 101/209          |                                 |
| Multivariable              | 1.00       | 1.12 (0.77,1.64) | 1.18 (0.80,1.76) | 1.08 (0.71,1.64) | 0.81                            |

<sup>1</sup> *P* values were calculated by the Wald test of a score variable that contained median values of tertiles.

<sup>2</sup> Relative risks and 95% CIs were estimated by unconditional logistic regression adjusting for age, race, infertility history, menopausal status at diagnosis, time of day and fasting status at blood draw, birth weight (not full term, <5.5, 5.5-6.9, 7.0-8.4, ≥8.5 pounds), age at menarche (<12, 12, >12 years), body mass index (BMI) at age 18 (<18.5, 18.5-22.4, 22.5-24.9, ≥25 kg/m<sup>2</sup>) and at blood draw (<22.5, 22.5-24.9, 25.0-29.9, ≥30 kg/m<sup>2</sup>), number of pregnancies >6 months (0, 1-2, >2 births), total months of breast feeding (nulliparous, 0 or <1, 1-11, 12-23, ≥24 months), time since last birth (<2, 2-3, 4-5, ≥6 years), age at first birth (<25, 25-29, 30-34, ≥35 years), smoking history (never, past,

current), oral contraceptive use (ever, never), alcohol consumption (0, 0-5, >5 g/day), diet score tertiles, physical activity (<3, 3-8, 9-17,  $\geq$ 18 METs/week), menstrual cycle length at age 18-22 (<26, 26-31, 32-39,  $\geq$ 40 days), adult menstrual cycle length (<26, 26-31,  $\geq$ 32 days), menstrual cycle pattern at age 18-22 and adult menstrual cycle pattern (very regular, regular, irregular).

**Web Table 2.** Relative risks (and 95% confidence intervals) of laparoscopically confirmed endometriosis by quartile of plasma sex steroid hormone levels among Nurses' Health Study II participants with ovulatory cycles<sup>1</sup>

|                            | Quartile 1 | Quartile 2        | Quartile 3        | Quartile 4        | P for Trend <sup>2</sup> |
|----------------------------|------------|-------------------|-------------------|-------------------|--------------------------|
| <b>Estradiol</b>           |            |                   |                   |                   |                          |
| Follicular                 |            |                   |                   |                   |                          |
| Cutpoints (pg/mL)          | <27        | ≥27 – <40         | ≥40 – <59         | ≥59               |                          |
| Cases/controls             | 47/101     | 91/124            | 82/141            | 72/128            |                          |
| Multivariable <sup>3</sup> | 1.00       | 1.56 (0.94, 2.58) | 1.25 (0.75, 2.09) | 1.09 (0.63, 1.90) | 0.26                     |
| Luteal                     |            |                   |                   |                   |                          |
| Cutpoints (pg/mL)          | <98        | ≥98 – <133        | ≥133 – <187       | ≥187              |                          |
| Cases/controls             | 61/113     | 93/155            | 98/160            | 67/133            |                          |
| Multivariable              | 1.00       | 1.15 (0.71, 1.89) | 1.18 (0.74, 1.89) | 0.85 (0.51, 1.43) | 0.11                     |
| <b>Free Estradiol</b>      |            |                   |                   |                   |                          |
| Follicular                 |            |                   |                   |                   |                          |
| Cutpoints (pg/mL)          | <0.34      | ≥0.34 – <0.49     | ≥0.49 – <0.71     | ≥0.71             |                          |
| Cases/controls             | 54/113     | 82/123            | 99/130            | 57/128            |                          |
| Multivariable              | 1.00       | 1.36 (0.82, 2.25) | 1.64 (1.00, 2.69) | 0.70 (0.40, 1.21) | 0.74                     |
| Luteal                     |            |                   |                   |                   |                          |
| Cutpoints (pg/mL)          | <1.23      | ≥1.23 – <1.63     | ≥1.63 – <2.21     | ≥2.21             |                          |
| Cases/controls             | 70/117     | 100/154           | 76/160            | 73/130            |                          |
| Multivariable              | 1.00       | 1.11 (0.71, 1.74) | 0.67 (0.42, 1.07) | 0.85 (0.52, 1.40) | 0.13                     |
| <b>Estrone</b>             |            |                   |                   |                   |                          |
| Follicular                 |            |                   |                   |                   |                          |
| Cutpoints (pg/mL)          | <30        | ≥30 – <38         | ≥38 – <49         | ≥49               |                          |
| Cases/controls             | 60/122     | 72/124            | 75/138            | 85/113            |                          |
| Multivariable              | 1.00       | 1.10 (0.66, 1.83) | 0.85 (0.52, 1.39) | 1.36 (0.83, 2.23) | 0.15                     |
| Luteal                     |            |                   |                   |                   |                          |
| Cutpoints (pg/mL)          | <65        | ≥65 – <85         | ≥85 – <117        | ≥117              |                          |
| Cases/controls             | 70/129     | 79/158            | 108/154           | 62/120            |                          |
| Multivariate               | 1.00       | 0.89 (0.57, 1.40) | 1.38 (0.88, 2.16) | 0.94 (0.57, 1.57) | 0.37                     |
| <b>Testosterone</b>        |            |                   |                   |                   |                          |
| Cutpoints (ng/dL)          | <19        | ≥19 – <25         | ≥25 – <32         | ≥32               |                          |
| Cases/controls             | 79/126     | 104/165           | 73/147            | 65/125            |                          |
| Multivariable              | 1.00       | 1.16 (0.76, 1.78) | 0.85 (0.54, 1.35) | 0.87 (0.54, 1.40) | 0.18                     |
| <b>Free testosterone</b>   |            |                   |                   |                   |                          |
| Cutpoints (ng/dL)          | <0.13      | ≥0.13 – <0.19     | ≥0.19 – <0.27     | ≥0.27             |                          |
| Cases/controls             | 83/135     | 89/160            | 86/151            | 63/117            |                          |
| Multivariable              | 1.00       | 0.87 (0.57, 1.34) | 0.94 (0.60, 1.47) | 0.79 (0.47, 1.33) | 0.77                     |
| <b>Progesterone</b>        |            |                   |                   |                   |                          |
| Luteal                     |            |                   |                   |                   |                          |
| Cutpoints (ng/mL)          | <7         | ≥7 – <14          | ≥14 – <20         | ≥20               |                          |
| Cases/controls             | 45/52      | 92/170            | 106/163           | 78/179            |                          |
| Multivariable              | 1.00       | 0.48 (0.27, 0.86) | 0.61 (0.34, 1.10) | 0.44 (0.24, 0.82) | 0.31                     |
| <b>SHBG</b>                |            |                   |                   |                   |                          |
| Cutpoints (nmol/L)         | <47        | ≥47 – <68         | ≥68 – <94         | ≥94               |                          |
| Cases/controls             | 68/124     | 81/146            | 94/150            | 78/144            |                          |
| Multivariable              | 1.00       | 1.12 (0.69, 1.79) | 1.30 (0.80, 2.10) | 1.11 (0.66, 1.87) | 0.86                     |

<sup>1</sup> Ovulatory cycles were defined as progesterone levels of ≥4 ng/mL.

<sup>2</sup> P values were calculated by the Wald test of a score variable that contained median values of tertiles.

<sup>3</sup> Relative risks and 95% CIs were estimated by conditional logistic regression conditioned on the matching factors including age, race, infertility history, menopausal status at diagnosis, as well as month, time of day and fasting status at blood draw and further adjusted for birth weight (not full term, <5.5, 5.5-6.9, 7.0-8.4, ≥8.5 pounds), age at menarche (<12, 12, >12 years), body mass index (BMI) at age 18 (<18.5, 18.5-22.4, 22.5-24.9, ≥25 kg/m<sup>2</sup>) and at blood draw (<22.5, 22.5-24.9, 25.0-29.9, ≥30 kg/m<sup>2</sup>), number of pregnancies >6 months (0, 1-2, >2 births), total

months of breast feeding (nulliparous, 0 or <1, 1-11, 12-23,  $\geq 24$  months), time since last birth (<2, 2-3, 4-5,  $\geq 6$  years), age at first birth (<25, 25-29, 30-34,  $\geq 35$  years), smoking history (never, past, current), oral contraceptive use (ever, never), alcohol consumption (0, 0-5, >5 g/day), diet score tertiles, physical activity (<3, 3-8, 9-17,  $\geq 18$  METs/week), menstrual cycle length at age 18-22 (<26, 26-31, 32-39,  $\geq 40$  days), adult menstrual cycle length (<26, 26-31,  $\geq 32$  days), menstrual cycle pattern at age 18-22 and adult menstrual cycle pattern (very regular, regular, irregular).

**Web Table 3.** Relative risks (and 95% confidence intervals)<sup>1</sup> of laparoscopically confirmed endometriosis by quartiles of plasma sex steroid levels among subgroups in Nurses' Health Study II

|                    | Quartile 2                                                                         | Quartile 3       | Quartile 4       | <i>P</i> <sub>trend</sub> <sup>2</sup> | Quartile 2                                                                      | Quartile 3       | Quartile 4       | <i>P</i> <sub>trend</sub> <sup>2</sup> | <i>P</i> <sub>LRT</sub> <sup>3</sup> |
|--------------------|------------------------------------------------------------------------------------|------------------|------------------|----------------------------------------|---------------------------------------------------------------------------------|------------------|------------------|----------------------------------------|--------------------------------------|
| <b>Hormone</b>     | <b>Age at Diagnosis &lt;45 Years</b><br>(cases/controls: 16-45/27-66)              |                  |                  |                                        | <b>Age at Diagnosis ≥45 Years</b><br>(cases/controls: 32-99/113-173)            |                  |                  |                                        |                                      |
| Follicular E2      | 1.33 (0.63,2.81)                                                                   | 0.91 (0.41,2.02) | 1.36 (0.60,3.10) | 0.63                                   | 3.41 (2.05,5.66)                                                                | 2.86 (1.70,4.81) | 2.09 (1.24,3.54) | 0.22                                   | 0.08                                 |
| Luteal E2          | 0.90 (0.44,1.83)                                                                   | 1.37 (0.71,2.67) | 0.84 (0.42,1.66) | 0.72                                   | 1.36 (0.88,2.10)                                                                | 1.23 (0.79,1.91) | 0.89 (0.56,1.42) | 0.36                                   | 0.54                                 |
| Follicular Free E2 | 1.26 (0.60,2.67)                                                                   | 1.48 (0.71,3.08) | 1.13 (0.47,2.72) | 0.76                                   | 1.80 (1.11,2.93)                                                                | 2.42 (1.49,3.93) | 1.34 (0.82,2.20) | 0.63                                   | 0.72                                 |
| Luteal Free E2     | 2.16 (1.10,4.23)                                                                   | 1.42 (0.69,2.92) | 1.57 (0.78,3.17) | 0.45                                   | 0.98 (0.64,1.51)                                                                | 0.77 (0.49,1.21) | 0.86 (0.55,1.34) | 0.40                                   | 0.33                                 |
| Follicular Estrone | 1.58 (0.75,3.34)                                                                   | 1.04 (0.47,2.27) | 1.98 (0.89,4.37) | 0.16                                   | 1.06 (0.65,1.71)                                                                | 1.40 (0.88,2.23) | 1.60 (1.02,2.52) | 0.02                                   | 0.46                                 |
| Luteal Estrone     | 1.20 (0.60,2.41)                                                                   | 1.70 (0.89,3.27) | 1.41 (0.70,2.84) | 0.27                                   | 0.99 (0.63,1.56)                                                                | 1.29 (0.83,1.99) | 0.79 (0.50,1.26) | 0.36                                   | 0.60                                 |
| Testosterone       | 1.75 (0.91,3.36)                                                                   | 0.94 (0.48,1.86) | 0.70 (0.35,1.42) | 0.09                                   | 1.25 (0.85,1.83)                                                                | 0.90 (0.59,1.38) | 1.00 (0.65,1.52) | 0.58                                   | 0.61                                 |
| Free testosterone  | 1.40 (0.71,2.74)                                                                   | 0.92 (0.48,1.78) | 1.19 (0.63,2.24) | 0.81                                   | 0.99 (0.66,1.50)                                                                | 1.16 (0.77,1.75) | 1.04 (0.68,1.60) | 0.77                                   | 0.52                                 |
| Progesterone       | 0.87 (0.41,1.86)                                                                   | 1.23 (0.62,2.46) | 0.65 (0.31,1.38) | 0.39                                   | 0.86 (0.56,1.31)                                                                | 0.97 (0.63,1.51) | 0.85 (0.53,1.39) | 0.65                                   | 0.64                                 |
| SHBG               | 1.35 (0.71,2.55)                                                                   | 0.72 (0.37,1.39) | 0.66 (0.35,1.26) | 0.07                                   | 0.84 (0.55,1.27)                                                                | 1.13 (0.76,1.68) | 1.04 (0.69,1.57) | 0.57                                   | 0.12                                 |
| <b>Hormone</b>     | <b>BMI at Blood Draw &lt;25 kg/m<sup>2</sup></b><br>(cases/controls: 24-83/44-179) |                  |                  |                                        | <b>BMI at Blood Draw ≥25 kg/m<sup>2</sup></b><br>(cases/controls: 18-79/30-165) |                  |                  |                                        |                                      |
| Follicular E2      | 2.26 (1.23,4.14)                                                                   | 1.76 (0.96,3.23) | 2.08 (1.14,3.80) | 0.13                                   | 3.24 (1.79,5.86)                                                                | 2.90 (1.50,5.59) | 1.57 (0.78,3.18) | 0.40                                   | 0.36                                 |
| Luteal E2          | 0.98 (0.60,1.61)                                                                   | 0.86 (0.52,1.41) | 0.68 (0.41,1.13) | 0.09                                   | 1.51 (0.85,2.68)                                                                | 2.19 (1.24,3.88) | 1.15 (0.62,2.13) | 0.51                                   | 0.12                                 |
| Follicular Free E2 | 1.37 (0.81,2.32)                                                                   | 1.89 (1.12,3.19) | 1.26 (0.71,2.22) | 0.50                                   | 1.85 (0.96,3.56)                                                                | 2.30 (1.19,4.46) | 1.21 (0.62,2.35) | 0.91                                   | 0.81                                 |
| Luteal Free E2     | 1.15 (0.74,1.79)                                                                   | 0.89 (0.55,1.45) | 0.64 (0.38,1.08) | 0.05                                   | 1.21 (0.64,2.27)                                                                | 0.92 (0.49,1.73) | 1.54 (0.84,2.80) | 0.17                                   | 0.04                                 |
| Follicular Estrone | 1.21 (0.72,2.03)                                                                   | 1.19 (0.70,2.01) | 1.80 (1.08,3.01) | 0.02                                   | 1.12 (0.59,2.15)                                                                | 1.48 (0.79,2.77) | 1.42 (0.77,2.64) | 0.26                                   | 0.71                                 |
| Luteal Estrone     | 1.16 (0.71,1.88)                                                                   | 1.44 (0.91,2.28) | 0.83 (0.49,1.41) | 0.55                                   | 0.89 (0.49,1.62)                                                                | 1.30 (0.72,2.34) | 1.00 (0.55,1.79) | 0.85                                   | 0.64                                 |
| Testosterone       | 1.05 (0.68,1.62)                                                                   | 0.87 (0.54,1.39) | 0.92 (0.58,1.47) | 0.57                                   | 1.86 (1.12,3.12)                                                                | 1.00 (0.57,1.73) | 0.84 (0.47,1.52) | 0.12                                   | 0.16                                 |
| Free testosterone  | 1.38 (0.92,2.07)                                                                   | 1.06 (0.67,1.67) | 1.49 (0.89,2.49) | 0.23                                   | 0.47 (0.23,0.95)                                                                | 0.72 (0.38,1.36) | 0.53 (0.28,1.00) | 0.19                                   | 0.03                                 |
| Progesterone       | 0.74 (0.44,1.24)                                                                   | 0.61 (0.37,0.99) | 0.56 (0.33,0.93) | 0.02                                   | 0.94 (0.54,1.63)                                                                | 2.34 (1.30,4.19) | 1.22 (0.59,2.51) | 0.09                                   | 0.002                                |
| SHBG               | 0.63 (0.35,1.14)                                                                   | 0.76 (0.43,1.33) | 0.67 (0.38,1.16) | 0.41                                   | 1.27 (0.80,2.00)                                                                | 1.26 (0.73,2.17) | 1.40 (0.72,2.75) | 0.24                                   | 0.24                                 |
| <b>Hormone</b>     | <b>Nulliparous</b><br>(cases/controls: 11-40/24-49)                                |                  |                  |                                        | <b>Parous</b><br>(cases/controls: 43-111/127-181)                               |                  |                  |                                        |                                      |
| Follicular E2      | 2.30 (1.44,3.67)                                                                   | 1.81 (1.11,2.96) | 1.62 (0.99,2.66) | 0.37                                   | 4.48 (1.68,11.9)                                                                | 3.07 (1.15,8.17) | 2.44 (0.88,6.73) | 0.53                                   | 0.66                                 |
| Luteal E2          | 1.11 (0.74,1.69)                                                                   | 0.91 (0.59,1.38) | 0.82 (0.53,1.27) | 0.23                                   | 1.35 (0.57,3.17)                                                                | 3.04 (1.34,6.91) | 1.17 (0.50,2.73) | 0.59                                   | 0.01                                 |
| Follicular Free E2 | 1.45 (0.92,2.30)                                                                   | 1.86 (1.17,2.94) | 1.16 (0.71,1.89) | 0.75                                   | 2.31 (0.91,5.83)                                                                | 2.61 (1.00,6.78) | 1.20 (0.46,3.10) | 0.65                                   | 0.63                                 |
| Luteal Free E2     | 1.05 (0.70,1.58)                                                                   | 0.85 (0.55,1.33) | 0.92 (0.60,1.41) | 0.57                                   | 2.29 (0.99,5.29)                                                                | 1.03 (0.46,2.31) | 1.54 (0.66,3.63) | 0.66                                   | 0.29                                 |
| Follicular Estrone | 1.08 (0.69,1.70)                                                                   | 1.09 (0.69,1.73) | 1.53 (0.99,2.37) | 0.04                                   | 1.74 (0.67,4.54)                                                                | 2.09 (0.83,5.27) | 2.01 (0.77,5.25) | 0.27                                   | 0.75                                 |
| Luteal Estrone     | 0.86 (0.56,1.32)                                                                   | 1.20 (0.79,1.81) | 0.85 (0.55,1.31) | 0.67                                   | 2.39 (1.03,5.56)                                                                | 2.68 (1.19,6.05) | 1.40 (0.57,3.44) | 0.63                                   | 0.27                                 |
| Testosterone       | 1.33 (0.92,1.92)                                                                   | 0.75 (0.50,1.14) | 0.75 (0.50,1.14) | 0.03                                   | 1.30 (0.60,2.80)                                                                | 1.48 (0.69,3.17) | 1.49 (0.67,3.34) | 0.33                                   | 0.20                                 |
| Free testosterone  | 0.86 (0.58,1.29)                                                                   | 0.88 (0.60,1.31) | 0.93 (0.62,1.39) | 0.81                                   | 2.45 (1.12,5.37)                                                                | 2.28 (1.01,5.12) | 1.76 (0.80,3.85) | 0.46                                   | 0.09                                 |
| Progesterone       | 0.82 (0.54,1.25)                                                                   | 0.94 (0.62,1.42) | 0.69 (0.43,1.10) | 0.19                                   | 1.38 (0.60,3.13)                                                                | 1.93 (0.83,4.50) | 1.72 (0.72,4.13) | 0.17                                   | 0.38                                 |
| SHBG               | 0.98 (0.66,1.45)                                                                   | 1.00 (0.68,1.48) | 0.88 (0.59,1.32) | 0.56                                   | 1.16 (0.53,2.54)                                                                | 1.30 (0.63,2.69) | 1.14 (0.56,2.33) | 0.72                                   | 0.99                                 |
| <b>Hormone</b>     | <b>Never Smoker</b><br>(cases/controls: 40-107/102-161)                            |                  |                  |                                        | <b>Ever Smoker</b><br>(cases/controls: 14-38/42-88)                             |                  |                  |                                        |                                      |

|                    |                  |                  |                  |      |                  |                  |                  |      |      |
|--------------------|------------------|------------------|------------------|------|------------------|------------------|------------------|------|------|
| Follicular E2      | 2.27 (1.39,3.70) | 1.65 (0.99,2.75) | 1.42 (0.85,2.37) | 0.90 | 3.11 (1.42,6.82) | 2.91 (1.29,6.57) | 2.88 (1.25,6.64) | 0.06 | 0.57 |
| Luteal E2          | 1.31 (0.84,2.04) | 1.59 (1.03,2.46) | 1.02 (0.64,1.61) | 0.98 | 0.99 (0.51,1.92) | 0.67 (0.33,1.37) | 0.59 (0.28,1.23) | 0.10 | 0.16 |
| Follicular Free E2 | 1.49 (0.92,2.41) | 1.56 (0.97,2.51) | 0.96 (0.58,1.60) | 0.50 | 1.86 (0.85,4.10) | 4.28 (1.95,9.44) | 2.12 (0.94,4.77) | 0.09 | 0.13 |
| Luteal Free E2     | 1.37 (0.89,2.10) | 1.07 (0.68,1.66) | 1.05 (0.67,1.63) | 0.82 | 1.05 (0.53,2.10) | 0.59 (0.28,1.26) | 1.06 (0.52,2.19) | 0.94 | 0.38 |
| Follicular Estrone | 0.78 (0.48,1.27) | 1.09 (0.68,1.74) | 1.43 (0.90,2.27) | 0.03 | 2.76 (1.33,5.72) | 1.64 (0.74,3.61) | 2.14 (0.99,4.61) | 0.25 | 0.03 |
| Luteal Estrone     | 1.09 (0.69,1.70) | 1.42 (0.92,2.17) | 1.15 (0.73,1.81) | 0.46 | 1.03 (0.51,2.07) | 1.35 (0.69,2.64) | 0.53 (0.24,1.15) | 0.12 | 0.26 |
| Testosterone       | 1.26 (0.86,1.86) | 0.95 (0.62,1.44) | 1.06 (0.69,1.64) | 0.83 | 1.59 (0.84,3.03) | 0.89 (0.44,1.78) | 0.75 (0.37,1.51) | 0.13 | 0.78 |
| Free testosterone  | 0.89 (0.59,1.34) | 1.02 (0.68,1.55) | 1.03 (0.68,1.58) | 0.72 | 1.58 (0.80,3.12) | 1.20 (0.61,2.37) | 1.36 (0.68,2.69) | 0.64 | 0.40 |
| Progesterone       | 1.05 (0.67,1.64) | 1.14 (0.74,1.77) | 1.00 (0.62,1.62) | 0.90 | 0.48 (0.24,0.96) | 0.73 (0.37,1.46) | 0.42 (0.19,0.93) | 0.08 | 0.10 |
| SHBG               | 1.05 (0.70,1.59) | 1.10 (0.73,1.66) | 1.07 (0.72,1.61) | 0.72 | 0.81 (0.43,1.54) | 0.83 (0.44,1.54) | 0.62 (0.31,1.22) | 0.19 | 0.52 |

<sup>1</sup>All relative risks and 95% CIs were estimated by conditional logistic regression conditioned on matching factors including age, race, infertility history, menopausal status at diagnosis, month of blood draw, time of blood draw, and fasting status at blood draw with Quartile 1 as the reference group.

<sup>2</sup>*P* values were calculated by the Wald test of a score variable that contained median values of the quartiles.

<sup>3</sup>*P* values calculated from Likelihood ratio tests of the interaction terms.

**Web Table 4.** Relative risks (and 95% confidence intervals) of laparoscopically confirmed endometriosis by quartile of plasma sex steroid hormone levels among Nurses' Health Study II participants with follicular estradiol levels <80 pg/mL

|                            | Quartile 1 | Quartile 2        | Quartile 3        | Quartile 4        | P for Trend <sup>1</sup> |
|----------------------------|------------|-------------------|-------------------|-------------------|--------------------------|
| <b>Estradiol</b>           |            |                   |                   |                   |                          |
| Follicular                 |            |                   |                   |                   |                          |
| Cutpoints (pg/mL)          | <27        | ≥27 – <40         | ≥40 – <59         | ≥59               |                          |
| Cases/controls             | 53/146     | 115/147           | 92/145            | 44/73             |                          |
| Multivariable <sup>2</sup> | 1.00       | 2.40 (1.50, 3.83) | 1.98 (1.22, 3.21) | 1.66 (0.93, 2.96) | 0.17                     |
| Luteal                     |            |                   |                   |                   |                          |
| Cutpoints (pg/mL)          | <98        | ≥98 – <133        | ≥133 – <187       | ≥187              |                          |
| Cases/controls             | 77/137     | 95/150            | 92/166            | 72/139            |                          |
| Multivariable              | 1.00       | 1.20 (0.75, 1.90) | 1.03 (0.64, 1.66) | 0.84 (0.51, 1.37) | 0.27                     |
| <b>Free Estradiol</b>      |            |                   |                   |                   |                          |
| Follicular                 |            |                   |                   |                   |                          |
| Cutpoints (pg/mL)          | <0.34      | ≥0.34 – <0.49     | ≥0.49 – <0.71     | ≥0.71             |                          |
| Cases/controls             | 62/151     | 96/139            | 104/145           | 40/72             |                          |
| Multivariable              | 1.00       | 1.98 (1.22, 3.20) | 2.15 (1.35, 3.45) | 1.18 (0.66, 2.11) | 0.48                     |
| Luteal                     |            |                   |                   |                   |                          |
| Cutpoints (pg/mL)          | <1.23      | ≥1.23 – <1.63     | ≥1.63 – <2.21     | ≥2.21             |                          |
| Cases/controls             | 76/137     | 100/149           | 76/153            | 84/152            |                          |
| Multivariable              | 1.00       | 1.22 (0.78, 1.91) | 0.79 (0.49, 1.27) | 0.87 (0.54, 1.40) | 0.27                     |
| <b>Estrone</b>             |            |                   |                   |                   |                          |
| Follicular                 |            |                   |                   |                   |                          |
| Cutpoints (pg/mL)          | <30        | ≥30 – <38         | ≥38 – <49         | ≥49               |                          |
| Cases/controls             | 72/151     | 79/142            | 83/139            | 70/82             |                          |
| Multivariable              | 1.00       | 1.15 (0.72, 1.83) | 1.04 (0.65, 1.66) | 1.63 (0.98, 2.71) | 0.07                     |
| Luteal                     |            |                   |                   |                   |                          |
| Cutpoints (pg/mL)          | <65        | ≥65 – <85         | ≥85 – <117        | ≥117              |                          |
| Cases/controls             | 77/140     | 76/154            | 110/151           | 73/147            |                          |
| Multivariate               | 1.00       | 0.90 (0.57, 1.40) | 1.46 (0.94, 2.26) | 0.77 (0.48, 1.25) | 0.45                     |
| <b>Testosterone</b>        |            |                   |                   |                   |                          |
| Cutpoints (ng/dL)          | <19        | ≥19 – <25         | ≥25 – <32         | ≥32               |                          |
| Cases/controls             | 95/176     | 132/185           | 84/173            | 88/182            |                          |
| Multivariable              | 1.00       | 1.39 (0.96, 2.02) | 0.90 (0.60, 1.34) | 0.93 (0.62, 1.40) | 0.25                     |
| <b>Free testosterone</b>   |            |                   |                   |                   |                          |
| Cutpoints (ng/dL)          | <0.13      | ≥0.13 – <0.19     | ≥0.19 – <0.27     | ≥0.27             |                          |
| Cases/controls             | 84/157     | 97/172            | 102/172           | 100/181           |                          |
| Multivariable              | 1.00       | 0.97 (0.65, 1.46) | 1.12 (0.74, 1.70) | 0.93 (0.59, 1.46) | 0.79                     |
| <b>Progesterone</b>        |            |                   |                   |                   |                          |
| Luteal                     |            |                   |                   |                   |                          |
| Cutpoints (ng/mL)          | <7         | ≥7 – <14          | ≥14 – <20         | ≥20               |                          |
| Cases/controls             | 94/148     | 83/155            | 94/153            | 69/145            |                          |
| Multivariable              | 1.00       | 0.77 (0.48, 1.22) | 0.94 (0.59, 1.51) | 0.79 (0.47, 1.33) | 0.53                     |
| <b>SHBG</b>                |            |                   |                   |                   |                          |
| Cutpoints (nmol/L)         | <47        | ≥47 – <68         | ≥68 – <94         | ≥94               |                          |
| Cases/controls             | 107/177    | 95/179            | 104/176           | 79/155            |                          |
| Multivariable              | 1.00       | 0.94 (0.63, 1.41) | 1.09 (0.72, 1.65) | 0.94 (0.60, 1.49) | 0.91                     |

<sup>1</sup> P values were calculated by the Wald test of a score variable that contained median values of tertiles.

<sup>2</sup> Relative risks and 95% CIs were estimated by conditional logistic regression conditioned on the matching factors including age, race, infertility history, menopausal status at diagnosis, as well as month, time of day and fasting status at blood draw and further adjusted for birth weight (not full term, <5.5, 5.5-6.9, 7.0-8.4, ≥8.5 pounds), age at menarche (<12, 12, >12 years), body mass index (BMI) at age 18 (<18.5, 18.5-22.4, 22.5-24.9, ≥25 kg/m<sup>2</sup>) and at blood draw (<22.5, 22.5-24.9, 25.0-29.9, ≥30 kg/m<sup>2</sup>), number of pregnancies >6 months (0, 1-2, >2 births), total months of breast feeding (nulliparous, 0 or <1, 1-11, 12-23, ≥24 months), time since last birth (<2, 2-3, 4-5, ≥6 years),



age at first birth (<25, 25-29, 30-34, ≥35 years), smoking history (never, past, current), oral contraceptive use (ever, never), alcohol consumption (0, 0-5, >5 g/day), diet score tertiles, physical activity (<3, 3-8, 9-17, ≥18 METs/week), menstrual cycle length at age 18-22 (<26, 26-31, 32-39, ≥40 days), adult menstrual cycle length (<26, 26-31, ≥32 days), menstrual cycle pattern at age 18-22 and adult menstrual cycle pattern (very regular, regular, irregular).

**Web Table 5.** Relative risks (and 95% confidence intervals) of laparoscopically confirmed endometriosis by quartile of plasma sex steroid hormone levels in Nurses' Health Study II after excluding endometriosis cases within 2, 4, and 6 years of diagnosis and their matched controls

|                            | Quartile 1 | Quartile 2        | Quartile 3        | Quartile 4        | P for Trend <sup>1</sup> |
|----------------------------|------------|-------------------|-------------------|-------------------|--------------------------|
| <b>2 Years</b>             |            |                   |                   |                   |                          |
| <b>Estradiol</b>           |            |                   |                   |                   |                          |
| Follicular                 |            |                   |                   |                   |                          |
| Cutpoints (pg/mL)          | <27        | ≥27 – <40         | ≥40 – <59         | ≥59               |                          |
| Cases/controls             | 51/161     | 115/163           | 90/163            | 84/164            |                          |
| Multivariable <sup>2</sup> | 1.00       | 2.33 (1.49, 3.65) | 1.91 (1.20, 3.02) | 1.75 (1.09, 2.80) | 0.20                     |
| Luteal                     |            |                   |                   |                   |                          |
| Cutpoints (pg/mL)          | <98        | ≥98 – <133        | ≥133 – <187       | ≥187              |                          |
| Cases/controls             | 84/179     | 104/182           | 100/181           | 79/179            |                          |
| Multivariable              | 1.00       | 1.20 (0.80, 1.82) | 1.17 (0.77, 1.78) | 0.81 (0.52, 1.27) | 0.21                     |
| <b>Free Estradiol</b>      |            |                   |                   |                   |                          |
| Follicular                 |            |                   |                   |                   |                          |
| Cutpoints (pg/mL)          | <0.34      | ≥0.34 – <0.49     | ≥0.49 – <0.71     | ≥0.71             |                          |
| Cases/controls             | 63/161     | 96/161            | 110/161           | 68/161            |                          |
| Multivariable              | 1.00       | 1.63 (1.04, 2.55) | 2.04 (1.31, 3.17) | 1.02 (0.64, 1.62) | 0.68                     |
| Luteal                     |            |                   |                   |                   |                          |
| Cutpoints (pg/mL)          | <1.23      | ≥1.23 – <1.63     | ≥1.63 – <2.21     | ≥2.21             |                          |
| Cases/controls             | 92/180     | 108/180           | 83/180            | 84/180            |                          |
| Multivariable              | 1.00       | 1.13 (0.77, 1.68) | 0.78 (0.52, 1.17) | 0.78 (0.51, 1.19) | 0.11                     |
| <b>Estrone</b>             |            |                   |                   |                   |                          |
| Follicular                 |            |                   |                   |                   |                          |
| Cutpoints (pg/mL)          | <30        | ≥30 – <38         | ≥38 – <49         | ≥49               |                          |
| Cases/controls             | 73/166     | 80/158            | 84/169            | 103/162           |                          |
| Multivariable              | 1.00       | 1.14 (0.74, 1.76) | 0.96 (0.62, 1.47) | 1.37 (0.90, 2.09) | 0.14                     |
| Luteal                     |            |                   |                   |                   |                          |
| Cutpoints (pg/mL)          | <65        | ≥65 – <85         | ≥85 – <117        | ≥117              |                          |
| Cases/controls             | 82/180     | 87/182            | 119/177           | 80/182            |                          |
| Multivariate               | 1.00       | 1.03 (0.68, 1.55) | 1.55 (1.04, 2.31) | 0.85 (0.55, 1.34) | 0.56                     |
| <b>Testosterone</b>        |            |                   |                   |                   |                          |
| Follicular                 |            |                   |                   |                   |                          |
| Cutpoints (ng/dL)          | <19        | ≥19 – <25         | ≥25 – <32         | ≥32               |                          |
| Cases/controls             | 104/202    | 134/218           | 89/206            | 95/203            |                          |
| Multivariable              | 1.00       | 1.26 (0.89, 1.79) | 0.87 (0.59, 1.27) | 0.93 (0.63, 1.37) | 0.36                     |
| <b>Free testosterone</b>   |            |                   |                   |                   |                          |
| Follicular                 |            |                   |                   |                   |                          |
| Cutpoints (ng/dL)          | <0.13      | ≥0.13 – <0.19     | ≥0.19 – <0.27     | ≥0.27             |                          |
| Cases/controls             | 103/198    | 99/199            | 101/199           | 103/199           |                          |
| Multivariable              | 1.00       | 0.97 (0.67, 1.40) | 0.99 (0.68, 1.46) | 0.95 (0.63, 1.45) | 0.86                     |
| <b>Progesterone</b>        |            |                   |                   |                   |                          |
| Luteal                     |            |                   |                   |                   |                          |
| Cutpoints (ng/mL)          | <7         | ≥7 – <14          | ≥14 – <20         | ≥20               |                          |
| Cases/controls             | 105/183    | 87/183            | 106/183           | 74/183            |                          |
| Multivariable              | 1.00       | 0.77 (0.51, 1.17) | 0.96 (0.63, 1.48) | 0.69 (0.43, 1.10) | 0.21                     |
| <b>SHBG</b>                |            |                   |                   |                   |                          |
| Follicular                 |            |                   |                   |                   |                          |
| Cutpoints (nmol/L)         | <47        | ≥47 – <68         | ≥68 – <94         | ≥94               |                          |
| Cases/controls             | 102/200    | 93/200            | 112/199           | 101/201           |                          |
| Multivariable              | 1.00       | 1.07 (0.72, 1.59) | 1.29 (0.87, 1.91) | 1.19 (0.77, 1.82) | 0.38                     |
| <b>4 Years</b>             |            |                   |                   |                   |                          |
| <b>Estradiol</b>           |            |                   |                   |                   |                          |
| Follicular                 |            |                   |                   |                   |                          |
| Cutpoints (pg/mL)          | <27        | ≥27 – <41         | ≥41 – <60         | ≥60               |                          |
| Cases/controls             | 44/134     | 97/140            | 81/136            | 63/137            |                          |
| Multivariable <sup>3</sup> | 1.00       | 2.19 (1.35, 3.57) | 1.88 (1.15, 3.07) | 1.59 (0.94, 2.68) | 0.43                     |

|                          |        |                   |                   |                   |      |
|--------------------------|--------|-------------------|-------------------|-------------------|------|
| <b>Luteal</b>            |        |                   |                   |                   |      |
| Cutpoints (pg/mL)        | <98    | ≥98 – <134        | ≥134 – <186       | ≥186              |      |
| Cases/controls           | 71/149 | 91/155            | 77/147            | 66/150            |      |
| Multivariable            | 1.00   | 1.20 (0.77, 1.87) | 1.05 (0.67, 1.64) | 0.79 (0.48, 1.28) | 0.19 |
| <b>Free Estradiol</b>    |        |                   |                   |                   |      |
| <b>Follicular</b>        |        |                   |                   |                   |      |
| Cutpoints (pg/mL)        | <0.34  | ≥0.34 – <0.50     | ≥0.50 – <0.72     | ≥0.72             |      |
| Cases/controls           | 54/135 | 84/136            | 90/136            | 55/136            |      |
| Multivariable            | 1.00   | 1.60 (0.97, 2.65) | 1.91 (1.18, 3.09) | 0.97 (0.57, 1.64) | 0.64 |
| <b>Luteal</b>            |        |                   |                   |                   |      |
| Cutpoints (pg/mL)        | <1.24  | ≥1.24 – <1.65     | ≥1.65 – <2.23     | ≥2.23             |      |
| Cases/controls           | 78/150 | 88/150            | 69/151            | 70/150            |      |
| Multivariable            | 1.00   | 1.19 (0.77, 1.83) | 0.72 (0.46, 1.13) | 0.77 (0.48, 1.23) | 0.10 |
| <b>Estrone</b>           |        |                   |                   |                   |      |
| <b>Follicular</b>        |        |                   |                   |                   |      |
| Cutpoints (pg/mL)        | <30    | ≥30 – <38         | ≥38 – <49         | ≥49               |      |
| Cases/controls           | 63/138 | 67/133            | 70/142            | 85/137            |      |
| Multivariable            | 1.00   | 0.98 (0.60, 1.59) | 0.87 (0.54, 1.41) | 1.25 (0.79, 1.99) | 0.25 |
| <b>Luteal</b>            |        |                   |                   |                   |      |
| Cutpoints (pg/mL)        | <66    | ≥66 – <85         | ≥85 – <117        | ≥117              |      |
| Cases/controls           | 66/148 | 73/152            | 98/151            | 69/150            |      |
| Multivariate             | 1.00   | 1.02 (0.65, 1.60) | 1.53 (0.98, 2.38) | 0.89 (0.55, 1.45) | 0.75 |
| <b>Testosterone</b>      |        |                   |                   |                   |      |
| Cutpoints (ng/dL)        | <19    | ≥19 – <25         | ≥25 – <32         | ≥32               |      |
| Cases/controls           | 92/176 | 102/170           | 73/171            | 80/167            |      |
| Multivariable            | 1.00   | 1.31 (0.89, 1.93) | 0.87 (0.57, 1.31) | 1.02 (0.68, 1.55) | 0.61 |
| <b>Free testosterone</b> |        |                   |                   |                   |      |
| Cutpoints (ng/dL)        | <0.14  | ≥0.14 – <0.19     | ≥0.19 – <0.26     | ≥0.26             |      |
| Cases/controls           | 86/163 | 79/164            | 78/164            | 89/163            |      |
| Multivariable            | 1.00   | 0.91 (0.60, 1.38) | 0.88 (0.57, 1.38) | 0.99 (0.63, 1.56) | 0.95 |
| <b>Progesterone</b>      |        |                   |                   |                   |      |
| <b>Luteal</b>            |        |                   |                   |                   |      |
| Cutpoints (ng/mL)        | <8     | ≥8 – <14          | ≥14 – <21         | ≥21               |      |
| Cases/controls           | 90/152 | 74/151            | 97/153            | 47/152            |      |
| Multivariable            | 1.00   | 0.69 (0.44, 1.09) | 0.98 (0.62, 1.55) | 0.43 (0.25, 0.74) | 0.01 |
| <b>SHBG</b>              |        |                   |                   |                   |      |
| Cutpoints (nmol/L)       | <47    | ≥47 – <67         | ≥67 – <92         | ≥92               |      |
| Cases/controls           | 87/164 | 70/164            | 90/165            | 86/164            |      |
| Multivariable            | 1.00   | 0.98 (0.63, 1.53) | 1.28 (0.82, 1.99) | 1.29 (0.80, 2.07) | 0.22 |

### 6 Years

|                            |       |                   |                   |                   |      |
|----------------------------|-------|-------------------|-------------------|-------------------|------|
| <b>Estradiol</b>           |       |                   |                   |                   |      |
| <b>Follicular</b>          |       |                   |                   |                   |      |
| Cutpoints (pg/mL)          | <27   | ≥27 – <41         | ≥41 – <59         | ≥59               |      |
| Cases/controls             | 30/87 | 58/90             | 52/91             | 43/89             |      |
| Multivariable <sup>3</sup> | 1.00  | 2.16 (1.17, 4.00) | 2.14 (1.11, 4.13) | 1.96 (0.99, 3.87) | 0.20 |
| <b>Luteal</b>              |       |                   |                   |                   |      |
| Cutpoints (pg/mL)          | <96   | ≥96 – <132        | ≥132 – <184       | ≥184              |      |
| Cases/controls             | 41/95 | 57/95             | 54/97             | 40/95             |      |
| Multivariable              | 1.00  | 1.32 (0.72, 2.43) | 1.27 (0.69, 2.34) | 0.80 (0.42, 1.54) | 0.31 |
| <b>Free Estradiol</b>      |       |                   |                   |                   |      |
| <b>Follicular</b>          |       |                   |                   |                   |      |
| Cutpoints (pg/mL)          | <0.36 | ≥0.36 – <0.50     | ≥0.50 – <0.72     | ≥0.72             |      |
| Cases/controls             | 39/88 | 48/89             | 64/89             | 31/89             |      |
| Multivariable              | 1.00  | 1.68 (0.87, 3.24) | 2.70 (1.42, 5.13) | 0.87 (0.44, 1.72) | 0.59 |
| <b>Luteal</b>              |       |                   |                   |                   |      |
| Cutpoints (pg/mL)          | <1.22 | ≥1.22 – <1.62     | ≥1.62 – <2.18     | ≥2.18             |      |

|                          |        |                   |                   |                   |      |
|--------------------------|--------|-------------------|-------------------|-------------------|------|
| Cases/controls           | 57/95  | 48/96             | 42/96             | 45/95             |      |
| Multivariable            | 1.00   | 0.64 (0.35, 1.17) | 0.52 (0.29, 0.94) | 0.58 (0.31, 1.10) | 0.10 |
| <b>Estrone</b>           |        |                   |                   |                   |      |
| Follicular               |        |                   |                   |                   |      |
| Cutpoints (pg/mL)        | <30    | ≥30 – <38         | ≥38 – <48         | ≥48               |      |
| Cases/controls           | 44/85  | 34/93             | 50/90             | 55/90             |      |
| Multivariable            | 1.00   | 0.61 (0.32, 1.19) | 0.94 (0.51, 1.73) | 1.04 (0.57, 1.89) | 0.39 |
| Luteal                   |        |                   |                   |                   |      |
| Cutpoints (pg/mL)        | <66    | ≥66 – <84         | ≥84 – <112        | ≥112              |      |
| Cases/controls           | 45/94  | 43/97             | 55/95             | 50/96             |      |
| Multivariate             | 1.00   | 0.74 (0.41, 1.34) | 1.07 (0.60, 1.89) | 0.88 (0.48, 1.63) | 0.95 |
| <b>Testosterone</b>      |        |                   |                   |                   |      |
| Cutpoints (ng/dL)        | <19    | ≥19 – <25         | ≥25 – <31         | ≥31               |      |
| Cases/controls           | 52/105 | 62/109            | 48/108            | 55/109            |      |
| Multivariable            | 1.00   | 1.35 (0.81, 2.24) | 0.99 (0.58, 1.69) | 1.12 (0.65, 1.94) | 0.97 |
| <b>Free testosterone</b> |        |                   |                   |                   |      |
| Cutpoints (ng/dL)        | <0.14  | ≥0.14 – <0.18     | ≥0.18 – <0.26     | ≥0.26             |      |
| Cases/controls           | 47/100 | 50/101            | 52/101            | 54/101            |      |
| Multivariable            | 1.00   | 0.97 (0.54, 1.75) | 1.13 (0.61, 2.09) | 1.09 (0.59, 2.02) | 0.73 |
| <b>Progesterone</b>      |        |                   |                   |                   |      |
| Luteal                   |        |                   |                   |                   |      |
| Cutpoints (ng/mL)        | <8     | ≥8 – <14          | ≥14 – <20         | ≥20               |      |
| Cases/controls           | 60/96  | 48/95             | 50/96             | 35/96             |      |
| Multivariable            | 1.00   | 0.65 (0.35, 1.18) | 0.66 (0.34, 1.27) | 0.38 (0.18, 0.82) | 0.02 |
| <b>SHBG</b>              |        |                   |                   |                   |      |
| Cutpoints (nmol/L)       | <46    | ≥46 – <66         | ≥66 – <90         | ≥90               |      |
| Cases/controls           | 52/100 | 39/101            | 51/101            | 61/101            |      |
| Multivariable            | 1.00   | 0.96 (0.51, 1.78) | 1.22 (0.64, 2.33) | 1.51 (0.80, 2.88) | 0.13 |

<sup>1</sup> P values were calculated by the Wald test of a score variable that contained median values of tertiles.

<sup>2</sup> Relative risks and 95% CIs were estimated by conditional logistic regression conditioned on the matching factors including age, race, infertility history, menopausal status at diagnosis, as well as month, time of day and fasting status at blood draw and further adjusted for birth weight (not full term, <5.5, 5.5-6.9, 7.0-8.4, ≥8.5 pounds), age at menarche (<12, 12, >12 years), body mass index (BMI) at age 18 (<18.5, 18.5-22.4, 22.5-24.9, ≥25 kg/m<sup>2</sup>) and at blood draw (<22.5, 22.5-24.9, 25.0-29.9, ≥30 kg/m<sup>2</sup>), number of pregnancies >6 months (0, 1-2, >2 births), total months of breast feeding (nulliparous, 0 or <1, 1-11, 12-23, ≥24 months), time since last birth (<2, 2-3, 4-5, ≥6 years), age at first birth (<25, 25-29, 30-34, ≥35 years), smoking history (never, past, current), oral contraceptive use (ever, never), alcohol consumption (0, 0-5, >5 g/day), diet score tertiles, physical activity (<3, 3-8, 9-17, ≥18 METs/week), menstrual cycle length at age 18-22 (<26, 26-31, 32-39, ≥40 days), adult menstrual cycle length (<26, 26-31, ≥32 days), menstrual cycle pattern at age 18-22 and adult menstrual cycle pattern (very regular, regular, irregular).
